# Supplementary material for: Effects of High Intensity Ultrasound Stimulation on the Germination Performance of Caper Seeds
Source: MDPI journal article supplement (doi:10.3390/plants12122379), 2023-06-19
Supplement: s1 [file s1]

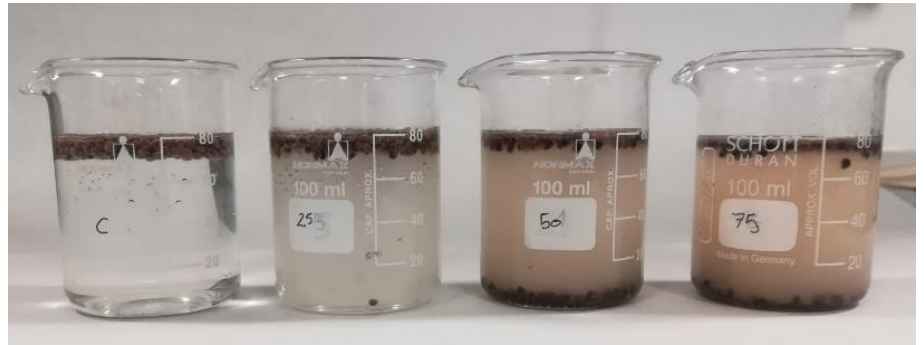

**Figure S1.** Appearance of 100 mL glass beakers with 80 mL of water and 50 seeds after ultrasonic treatments at powers of 0, 20, 50 and 100 W (from left to right) and a holding time of 60 s.

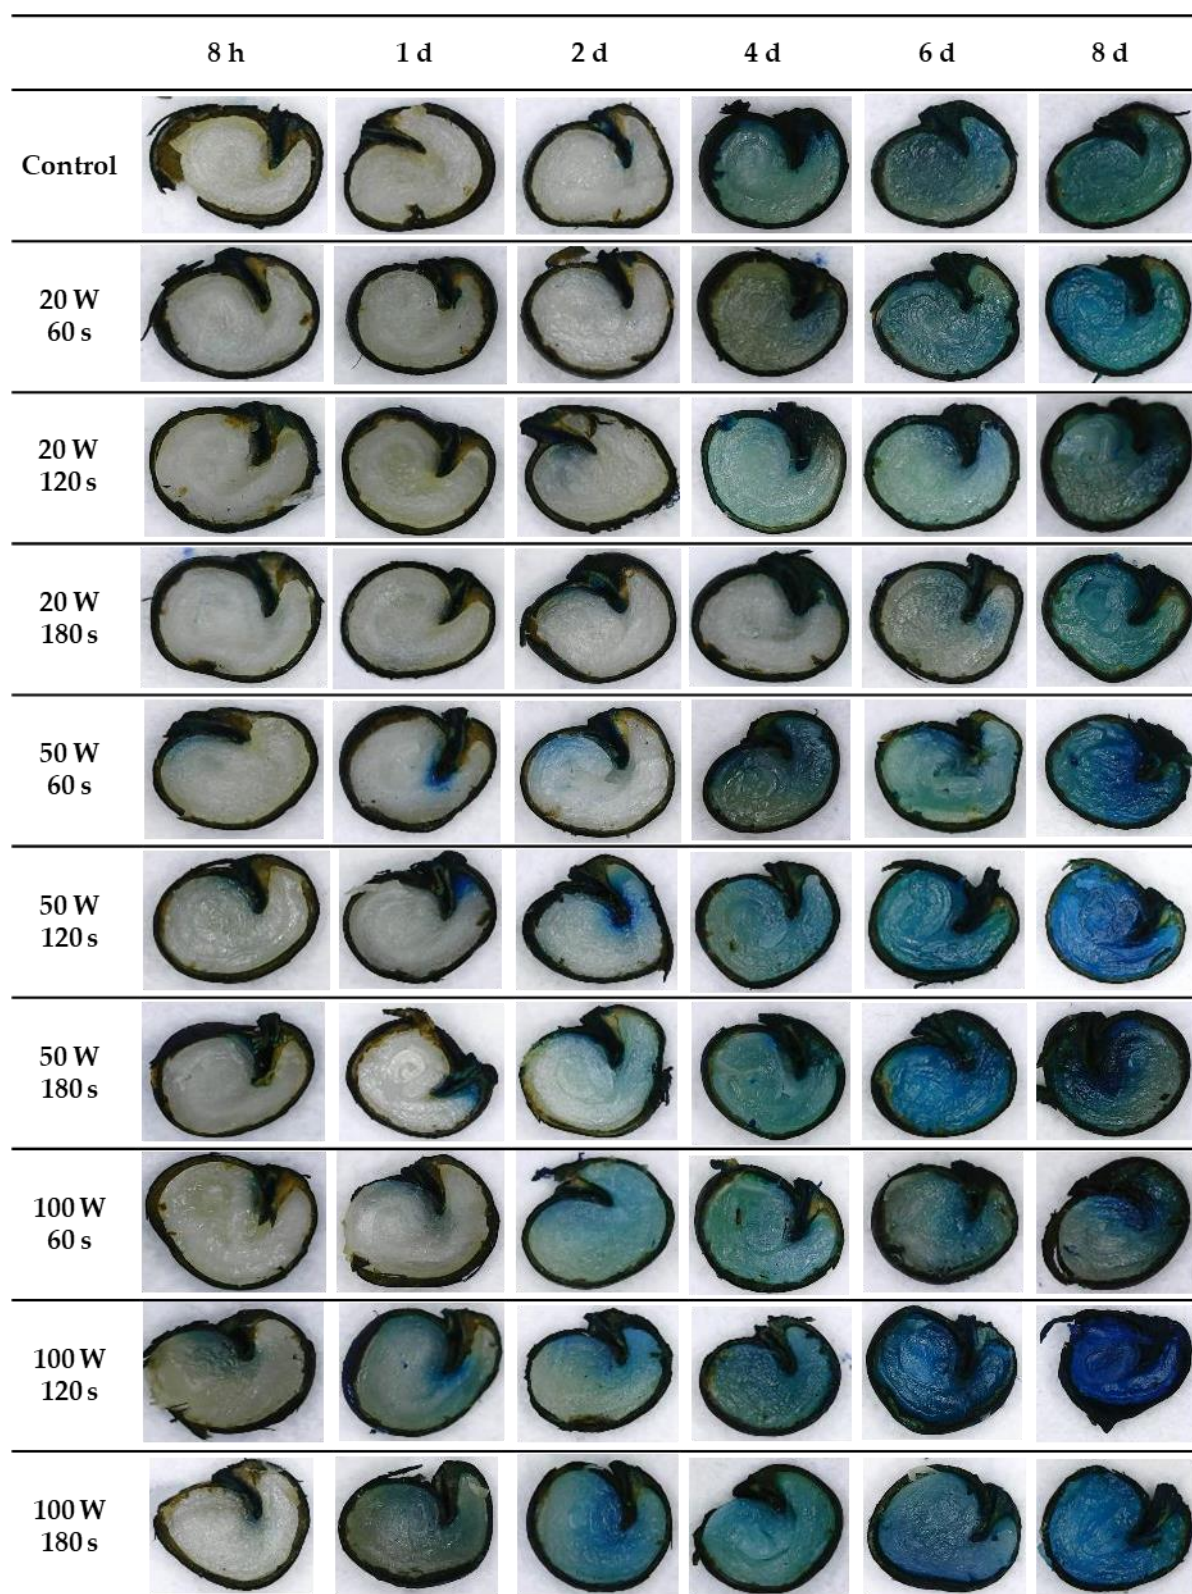

**Figure S2.** Time course of the staining with the methylene blue solution of the ultrasonicated seeds for 60, 120 and 180 s with the output powers of 20, 50 and 100 W.
